# Supplementary material for: Tri-Cyclic Nucleobase Analogs and Their Ribosides as Substrates of Purine-Nucleoside Phosphorylases. II Guanine and Isoguanine Derivatives
Source: Molecules. 2019 Apr 16;24(8):1493. doi: 10.3390/molecules24081493 (PMC6514686; doi:10.3390/molecules24081493)
Supplement: Supplementary file 1 [file molecules-24-01493-s001.pdf]

## Supplementary Materials

**Table S1.** Assigned chemical shifts of the three ribosides of *ε*isoGua in DMSO-d<sub>6</sub> at 25° C (*N*7-ribose) or 50° C (*N*<sup>6</sup> and *N*9-ribose). Chemical shift labels follow the naming convention of [41], extended for the etheno protons (see Scheme I.). NA – resonance not assigned. For the *N*7 and *N*9-ribose atoms in the positions 10 and 11 could not be unequivocally assigned and the two possible values are slash-separated.

| Atom  | Sample/Chemical Shift [PPM]   |                   |                   |
|-------|-------------------------------|-------------------|-------------------|
|       | <i>N</i> <sup>6</sup> -ribose | <i>N</i> 7-ribose | <i>N</i> 9-ribose |
| H1'   | 6.511                         | 5.987             | 5.712             |
| H2'   | 4.408                         | 4.556             | 4.625             |
| H3'   | 4.152                         | 4.167             | 4.125             |
| H4'   | 4.003                         | 3.989             | 3.962             |
| H5'   | 3.607/3.647                   | 3.571/ 3.719      | 3.548/ 3.661      |
| H5''  |                               |                   |                   |
| OH2'  | 5.405                         | 5.414             | NA                |
| OH3'  | 5.099                         | 5.197             | NA                |
| H8    | 7.822                         | 8.262             | 7.753             |
| H10*  | 7.775                         | 7.301/7.79        | 7.212/7.520       |
| H11** | 7.827                         |                   |                   |
| C1'   | 90.293                        | 89.833            | 89.114            |
| C2'   | 75.180                        | 74.114            | 73.484            |
| C3'   | 70.756                        | 70.175            | 71.497            |
| C4    | 86.658                        | 86.697            | 86.595            |
| C5'   | 61.727                        | 61.817            | 62.463            |
| C5    | NA                            | 104.600           | NA                |
| C6    | 138.682                       | 137.918           | 141.788           |
| C8    | 137.799                       | 140.026           | 135.525           |
| C10*  | 113.386                       | 130.645/113.699   | NA/111.558        |
| C11** | 116.951                       |                   |                   |
| N1    | 183.031                       | NA                | NA                |
| N6    | 157.149                       | NA                | NA                |

\*H7 or C7 according to IUPAC notation; \*\*H8 or C8 according to IUPAC notation.

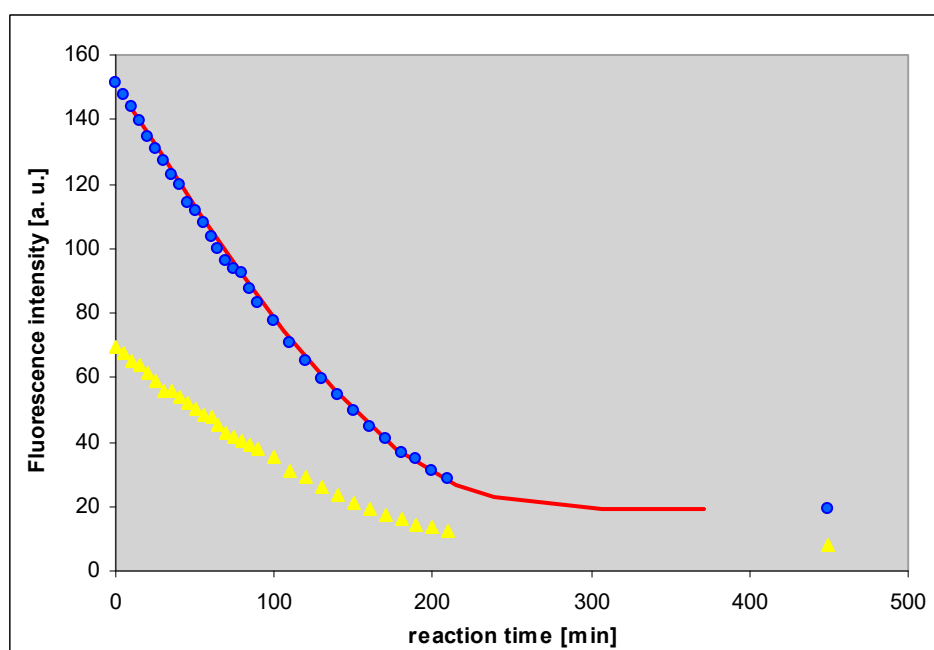

**Figure 1.** Time-dependence of fluorescence intensity (blue: at 400 nm; yellow: at 460 nm) measured during the ribosylation of *N*<sup>2</sup>,3-etheno-*O*<sup>6</sup>-methylguanine (35 μM) with R1P (0.5 mM) as a ribosyl

donor, with *E. coli* PNP as a catalyst, at pH 7.3 and temperature 25° C. In red color, solid line: a theoretically calculated progress curve, assuming  $K_m = 7 \mu\text{M}$  and Michaelis'-Menten kinetics. Fluorescence excitation was at 290 nm.

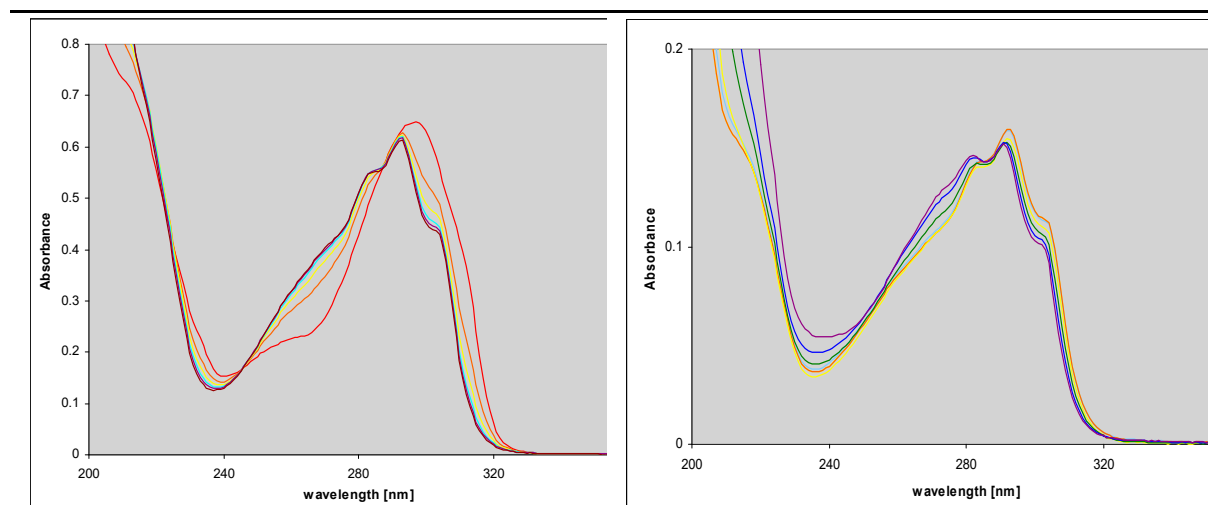

**Figure 2.** Spectrophotometric titrations of 1,*N*<sup>6</sup>-etheno-isoguanine. Left: determination of the lower (basic) pK<sub>a</sub> value: pH values from 2.9 (red) to 5.5 (violet); Right: determination of the upper (acidic) pK<sub>a</sub> value: pH from 6.25 (red) to 11.5 (violet). The fitted pK<sub>a</sub> values: 3.5 and 8.1 (±0.2).

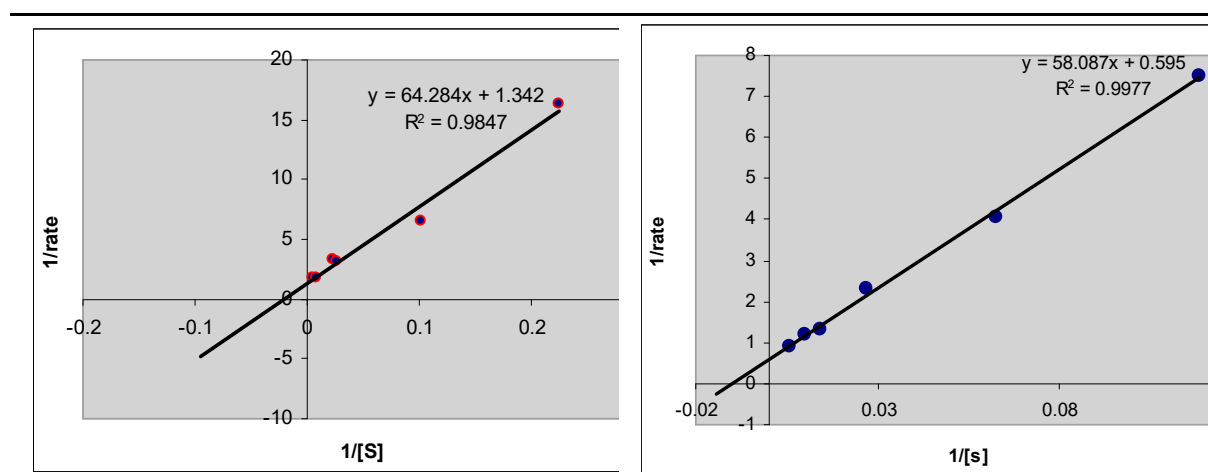

**Figure S3.** Double-reciprocal (Michaelis'-Menten) plots for ribosylation of 1,*N*<sup>2</sup>-ethenoguanine (right) and 1,*N*<sup>6</sup>-ethenoisoguanine (left), catalyzed by the *E. coli* PNP, wild-type. The obtained values of  $K_m$  were 48  $\mu\text{M}$  and 98  $\mu\text{M}$ , respectively. Conditions: 50 mM HEPS buffer, pH 7.3, with R1P (0.5 mM) as a ribosyl donor, temperature 25° C.

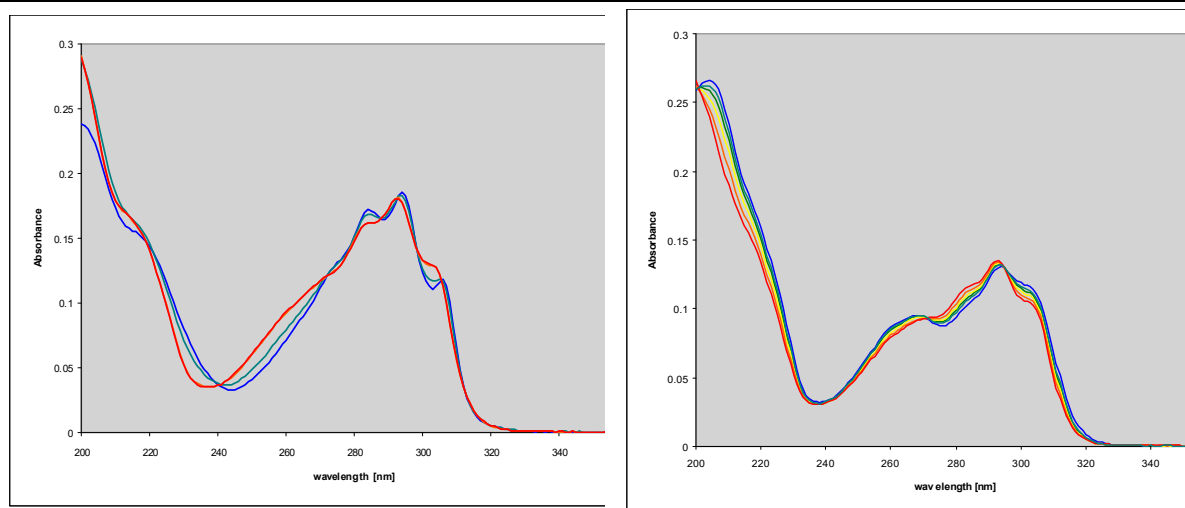

**Figure 4.** Phosphorolysis of *N*7- (left) and *N*9-β-D- (right) ribosides of 1,*N*<sup>6</sup>-etheno-isoguanosine in 50 mM phosphate buffer, pH 6.5, at 25° C, catalyzed by the *E. coli* PNP.
